# Supplementary material for: One-Step Crystallization of Gahnite Glass-Ceramics in a Wide Thermal Gradient
Source: MDPI journal article supplement (doi:10.3390/chemengineering7020037), 2023-04-18
Supplement: s1 [file s1]

## Supplementary materials

# One-Step Crystallization of Gahnite Glass-Ceramics in a Wide Thermal Gradient

Georgiy Yu. Shakhgildyan <sup>1,\*</sup>, Roman O. Alekseev <sup>1</sup>, Nikita V. Golubev <sup>1</sup>, Vitaliy I. Savinkov <sup>1</sup>, Andrey S. Naumov <sup>1</sup>, Natalya N. Presnyakova <sup>2</sup> and Vladimir N. Sigaev <sup>1</sup>

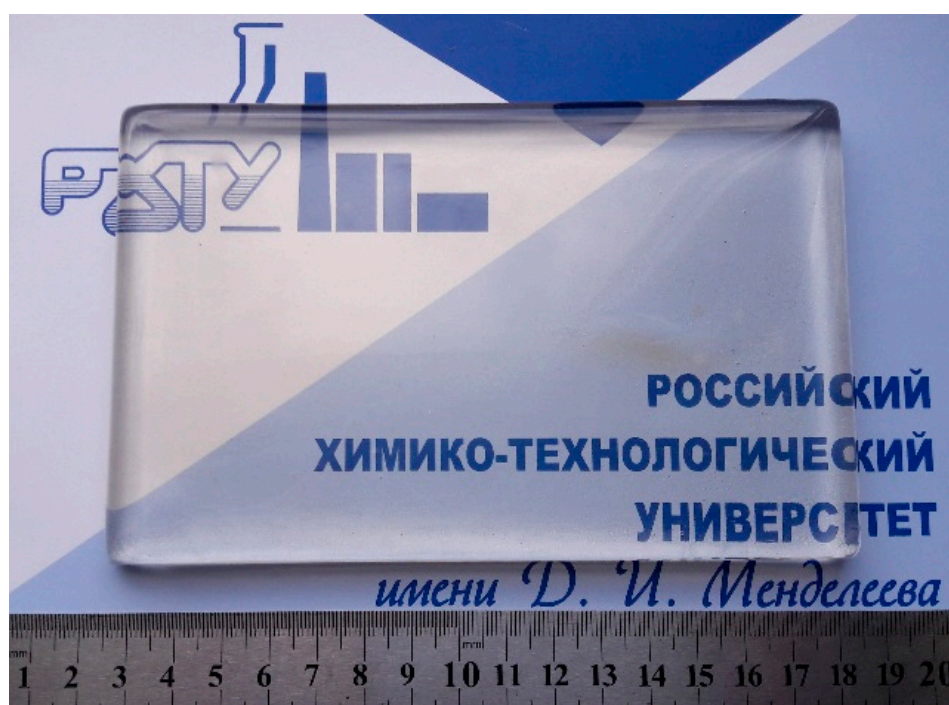

**Figure S1.** Photo of the glass block. The text is given for the visualization of the transparency of glass block and means the following: “MUCTR. Mendeleeev University of Chemical Technology of Russia”.
